# Supplementary material for: Sustained immunogenicity of the HPV-16/18 AS04-adjuvanted vaccine administered as a two-dose schedule in adolescent girls: Five-year clinical data and modeling predictions from a randomized study
Source: PubMed Central journal article supplement — Hum Vaccin Immunother. 2015 Jul 15;12(1):20–9. doi: 10.1080/21645515.2015.1065363 (PMC4962738; doi:10.1080/21645515.2015.1065363), 2015-07-15
Supplement: khvi-12-01-1065363-s001.pdf [file khvi-12-01-1065363-s001.pdf]

**Supp. Table 1 HPV-16 antibody responses up to Month 60 by age stratum and pre-vaccination serostatus (Month 60 ATP-I)**

| Age (years) | Pre-vaccination status | Month | 3D M0,1,6 schedule |                         |                            | 2D M0,6 schedule |                        |                          |
|-------------|------------------------|-------|--------------------|-------------------------|----------------------------|------------------|------------------------|--------------------------|
|             |                        |       | N                  | Seropositive, n (%)     | GMT* (95% CI), EU/mL       | N                | Seropositive, n (%)    | GMT* (95% CI), EU/mL     |
| 9–25        | Seronegative           | 0     | 127                | 0 (0.0)                 | 4.0 (4.0, 4.0)             | 119              | 0 (0.0)                | 4.0 (4.0, 4.0)           |
|             |                        | 7     | 127                | 127 (100)               | 14891.7 (12363.5, 17936.8) | 119              | 119 (100)              | 8854.4 (7569.7, 10357.2) |
|             |                        | 12    | 126                | 126 (100)               | 5188.2 (4253.7, 6328.0)    | 119              | 119 (100)              | 2685.7 (2300.6, 3135.4)  |
|             |                        | 18    | 125                | 125 (100)               | 3421.2 (2820.6, 4149.8)    | 119              | 119 (100)              | 1826.6 (1560.0, 2138.9)  |
|             |                        | 24    | 125                | 125 (100)               | 2677.6 (2210.6, 3243.3)    | 118              | 118 (100)              | 1401.4 (1203.6, 1631.8)  |
|             |                        | 36    | 127                | 127 (100)               | 2265.4 (1883.9, 2724.0)    | 116              | 116 (100)              | 1176.1 (1004.7, 1376.8)  |
|             |                        | 48    | 122                | 122 (100)               | 1894.8 (1574.9, 2279.7)    | 118              | 118 (100)              | 1002.4 (857.7, 1171.5)   |
|             |                        | 60    | 127                | 127 (100)               | 1830.1 (1543.1, 2170.4)    | 119              | 119 (100)              | 992.0 (851.7, 1155.5)    |
|             | Seropositive           | 0     | 19                 | 19 (100)                | 27.7 (14.9, 51.4)          | 12               | 12 (100)               | 38.1 (18.6, 77.9)        |
|             |                        | 7     | 19                 | 19 (100)                | 11633.1 (6832.7, 19805.8)  | 12               | 12 (100)               | 5542.4 (3308.4, 9284.8)  |
|             |                        | 12    | 19                 | 19 (100)                | 5268.7 (3175.6, 8741.7)    | 12               | 12 (100)               | 2512.9 (1493.5, 4228.1)  |
|             |                        | 18    | 19                 | 19 (100)                | 3947.4 (2422.4, 6432.3)    | 12               | 12 (100)               | 1690.4 (1031.3, 2770.7)  |
|             |                        | 24    | 19                 | 19 (100)                | 3150.7 (1939.1, 5119.5)    | 12               | 12 (100)               | 1261.4 (724.6, 2195.8)   |
|             |                        | 36    | 19                 | 19 (100)                | 2857.9 (1750.4, 4665.9)    | 12               | 12 (100)               | 1007.9 (590.8, 1719.7)   |
|             |                        | 48    | 19                 | 19 (100)                | 2413.0 (1472.3, 3954.7)    | 12               | 12 (100)               | 920.7 (558.6, 1517.6)    |
|             |                        | 60    | 19                 | 19 (100)                | 2060.2 (1290.2, 3289.8)    | 12               | 12 (100)               | 831.2 (535.4, 1290.5)    |
|             | Total                  | 0     | 146                | 19 (13.0)               | 5.1 (4.5, 5.9)             | 131              | 12 (9.2)               | 4.9 (4.3, 5.6)           |
|             |                        | 7     | 146                | 146 (100)               | 14420.7 (12115.7, 17164.2) | 131              | 131 (100)              | 8482.5 (7302.4, 9853.3)  |
|             |                        | 12    | 145                | 145 (100)               | 5198.7 (4330.5, 6241.0)    | 131              | 131 (100)              | 2669.4, 2305.9, 3090.2)  |
|             |                        | 18    | 144                | 144 (100)               | 3486.4 (2919.0, 4164.1)    | 131              | 131 (100)              | 1813.7 (1563.5, 2104.0)  |
|             |                        | 24    | 144                | 144 (100)               | 2735.7 (2293.2, 3263.6)    | 130              | 130 (100)              | 1387.9 (1200.6, 1604.4)  |
| 36          |                        | 146   | 146 (100)          | 2334.9 (1968.0, 2770.2) | 128                        | 128 (100)        | 1159.2 (998.6, 1345.8) |                          |
| 48          |                        | 141   | 141 (100)          | 1957.6 (1649.0, 2323.9) | 130                        | 130 (100)        | 994.5 (858.7, 1151.9)  |                          |
| 60          |                        | 146   | 146 (100)          | 1858.5 (1586.2, 2177.6) | 131                        | 131 (100)        | 976.1 (846.1, 1126.1)  |                          |

| Age (years) | Pre-vaccination status | Month | 3D M0,1,6 schedule |                         |                            | 2D M0,6 schedule |                         |                            |
|-------------|------------------------|-------|--------------------|-------------------------|----------------------------|------------------|-------------------------|----------------------------|
|             |                        |       | N                  | Seropositive, n (%)     | GMT* (95% CI), EU/mL       | N                | Seropositive, n (%)     | GMT* (95% CI), EU/mL       |
| 9–14        | Seronegative           | 0     | 48                 | 0 (0.0)                 | 4.0 (4.0, 4.0)             | 45               | 0 (0.0)                 | 4.0 (4.0, 4.0)             |
|             |                        | 7     | 48                 | 48 (100)                | 22812.9 (17484.3, 29765.3) | 45               | 45 (100)                | 12444.6 (9930.2, 15595.7)  |
|             |                        | 12    | 48                 | 48 (100)                | 8012.7 (5851.2, 10972.7)   | 45               | 45 (100)                | 3717.7 (2990.1, 4622.4)    |
|             |                        | 18    | 48                 | 48 (100)                | 5448.9 (4054.2, 7323.2)    | 45               | 45 (100)                | 2465.0 (1974.8, 3076.7)    |
|             |                        | 24    | 47                 | 47 (100)                | 4171.2 (3059.3, 5687.2)    | 45               | 45 (100)                | 1857.9 (1500.6, 2300.2)    |
|             |                        | 36    | 48                 | 48 (100)                | 3512.1 (2610.4, 4725.4)    | 43               | 43 (100)                | 1654.3 (1316.8, 2078.2)    |
|             |                        | 48    | 48                 | 48 (100)                | 2814.0 (2095.5, 3778.8)    | 44               | 44 (100)                | 1374.1 (1111.6, 1698.7)    |
|             |                        | 60    | 48                 | 48 (100)                | 2670.8 (2018.6, 3533.8)    | 45               | 45 (100)                | 1369.0 (1104.0, 1697.5)    |
|             | Seropositive           | 0     | 7                  | 7 (100)                 | 13.3 (9.5, 18.7)           | 1                | 1 (100)                 | 9.0                        |
|             |                        | 7     | 7                  | 7 (100)                 | 17621.9 (9057.5, 34284.6)  | 1                | 1 (100)                 | 13949.0                    |
|             |                        | 12    | 7                  | 7 (100)                 | 7441.0 (4508.7, 12280.4)   | 1                | 1 (100)                 | 3434.0                     |
|             |                        | 18    | 7                  | 7 (100)                 | 5065.8 (3441.4, 7456.8)    | 1                | 1 (100)                 | 1877.0                     |
|             |                        | 24    | 7                  | 7 (100)                 | 4256.5 (3030.9, 5977.6)    | 1                | 1 (100)                 | 894.0                      |
|             |                        | 36    | 7                  | 7 (100)                 | 3970.0 (2878.4, 5475.7)    | 1                | 1 (100)                 | 981.0                      |
|             |                        | 48    | 7                  | 7 (100)                 | 3032.3 (1775.5, 5178.6)    | 1                | 1 (100)                 | 563.0                      |
|             |                        | 60    | 7                  | 7 (100)                 | 2408.1 (1353.6, 4284.1)    | 1                | 1 (100)                 | 512.0                      |
|             | Total                  | 0     | 55                 | 7 (12.7)                | 4.7 (4.2, 5.2)             | 46               | 1 (2.2)                 | 4.1 (3.9, 4.2)             |
|             |                        | 7     | 55                 | 55 (100)                | 22075.4 (17345.5, 28095.1) | 46               | 46 (100)                | 12475.5 (10005.2, 15555.8) |
|             |                        | 12    | 55                 | 55 (100)                | 7937.6 (6014.3, 10476.0)   | 46               | 46 (100)                | 3711.3 (2999.6, 4591.9)    |
|             |                        | 18    | 55                 | 55 (100)                | 5398.5 (4164.1, 6998.9)    | 46               | 46 (100)                | 2450.4 (1972.4, 3044.3)    |
|             |                        | 24    | 54                 | 54 (100)                | 4182.2 (3190.6, 5481.8)    | 46               | 46 (100)                | 1828.6 (1480.4, 2258.5)    |
| 36          |                        | 55    | 55 (100)           | 3567.3 (2751.0, 4625.9) | 44                         | 44 (100)         | 1634.8 (1306.7, 2045.3) |                            |
| 48          |                        | 55    | 55 (100)           | 2840.9 (2187.4, 3689.6) | 45                         | 45 (100)         | 1347.2 (1090.9, 1663.5) |                            |
| 60          |                        | 55    | 55 (100)           | 2635.9 (2053.3, 3383.7) | 46                         | 46 (100)         | 1340.0 (1081.2, 1660.8) |                            |
| 15–25       | Seronegative           | 0     | 79                 | 0 (0.0)                 | 4.0 (4.0, 4.0)             | 74               | 0 (0.0)                 | 4.0 (4.0, 4.0)             |
|             |                        | 7     | 79                 | 79 (100)                | 11492.0 (9059.4, 14577.7)  | 74               | 74 (100)                | 7199.0 (5890.0, 8798.9)    |
|             |                        | 12    | 78                 | 78 (100)                | 3970.6 (3116.5, 5058.7)    | 74               | 74 (100)                | 2203.9 (1802.3, 2694.9)    |
|             |                        | 18    | 77                 | 77 (100)                | 2559.6 (2022.4, 3239.5)    | 74               | 74 (100)                | 1522.3 (1236.7, 1873.8)    |
|             |                        | 24    | 78                 | 78 (100)                | 2050.0 (1630.7, 2576.9)    | 73               | 73 (100)                | 1177.8 (963.2, 1440.2)     |
|             |                        | 36    | 79                 | 79 (100)                | 1735.5 (1393.4, 2161.7)    | 73               | 73 (100)                | 962.0 (787.0, 1176.0)      |
|             |                        | 48    | 74                 | 74 (100)                | 1466.1 (1172.4, 1833.3)    | 74               | 74 (100)                | 830.9 (676.3, 1020.9)      |
|             |                        | 60    | 79                 | 79 (100)                | 1454.5 (1187.2, 1782.1)    | 74               | 74 (100)                | 815.6 (669.3, 994.0)       |
|             | Seropositive           | 0     | 12                 | 12 (100)                | 42.5 (17.0, 106.3)         | 11               | 11 (100)                | 43.4 (21.0, 89.7)          |

| Age (years) | Pre-vaccination status | Month | 3D M0,1,6 schedule |                     |                           | 2D M0,6 schedule |                     |                         |
|-------------|------------------------|-------|--------------------|---------------------|---------------------------|------------------|---------------------|-------------------------|
|             |                        |       | N                  | Seropositive, n (%) | GMT* (95% CI), EU/mL      | N                | Seropositive, n (%) | GMT* (95% CI), EU/mL    |
|             |                        | 7     | 12                 | 12 (100)            | 9130.3 (4151.9, 20078.1)  | 11               | 11 (100)            | 5096.3 (2986.9, 8695.3) |
|             |                        | 12    | 12                 | 12 (100)            | 4307.7 (1965.3, 9442.2)   | 11               | 11 (100)            | 2442.6 (1377.4, 4331.4) |
|             |                        | 18    | 12                 | 12 (100)            | 3412.8 (1558.7, 7472.6)   | 11               | 11 (100)            | 1674.4 (968.5, 2894.8)  |
|             |                        | 24    | 12                 | 12 (100)            | 2643.7 (1215.7, 5749.2)   | 11               | 11 (100)            | 1301.5 (707.1, 2395.3)  |
|             |                        | 36    | 12                 | 12 (100)            | 2359.2 (1078.5, 5161.0)   | 11               | 11 (100)            | 1010.4 (558.7, 1827.2)  |
|             |                        | 48    | 12                 | 12 (100)            | 2112.0 (974.0, 4579.5)    | 11               | 11 (100)            | 962.8 (559.2, 1657.8)   |
|             |                        | 60    | 12                 | 12 (100)            | 1881.0 (909.8, 3888.7)    | 11               | 11 (100)            | 868.7 (539.8, 1398.0)   |
|             | Total                  | 0     | 91                 | 12 (13.2)           | 5.5 (4.5, 6.7)            | 85               | 11 (12.9)           | 5.4 (4.5, 6.6)          |
|             |                        | 7     | 91                 | 91 (100)            | 11148.6 (8898.8, 13967.2) | 85               | 85 (100)            | 6884.3 (5717.7, 8288.8) |
|             |                        | 12    | 90                 | 90 (100)            | 4014.0 (3194.8, 5043.2)   | 85               | 85 (100)            | 2233.4 (1854.5, 2689.7) |
|             |                        | 18    | 89                 | 89 (100)            | 2660.9 (2127.0, 3328.8)   | 85               | 85 (100)            | 1541.2 (1274.0, 1864.3) |
|             |                        | 24    | 90                 | 90 (100)            | 2120.7 (1705.3, 2637.2)   | 84               | 84 (100)            | 1193.3 (989.5, 1439.2)  |
|             |                        | 36    | 91                 | 91 (100)            | 1807.2 (1463.0, 2232.5)   | 84               | 84 (100)            | 968.2 (803.7, 1166.5)   |
|             |                        | 48    | 86                 | 86 (100)            | 1542.7 (1244.0, 1913.2)   | 85               | 85 (100)            | 846.9 (701.2, 1023.0)   |
|             |                        | 60    | 91                 | 91 (100)            | 1504.7 (1237.7, 1829.3)   | 85               | 85 (100)            | 822.3 (687.1, 984.1)    |

2D, two-dose schedule of the licensed HPV-16/18 AS04-adjuvanted vaccine formulation; 3D, three-dose schedule of the licensed HPV-16/18 AS04-adjuvanted vaccine formulation; 95% CI, exact 95% confidence interval; ATP-I, according-to-protocol immunogenicity cohort; ELISA, enzyme-linked immunosorbent assay; EU/mL, ELISA unit per milliliter; GMT, geometric mean antibody titer; M, month; N, number of evaluable seronegative subjects in the Month 60 according-to-protocol immunogenicity cohort; n (%), number (percentage) of seropositive subjects with antibody titer greater than or equal to the assay cut-off (titer equal to or above 8 EU/mL at Months 0, 7, 12, 18, 24, 36 and 48; titer equal to or above 19 EU/mL at Month 60). \*Antibody titers below the assay cut-off were given an arbitrary value of half the cut-off for the purpose of GMT calculation.

**Supp. Table 2 HPV-18 antibody responses up to Month 60 by age stratum and pre-vaccination serostatus (Month 60 ATP-I)**

| Age (years) | Pre-vacc status | Month | 3D M0,1,6 schedule |                       |                         | 2D M0,6 schedule |                      |                         |
|-------------|-----------------|-------|--------------------|-----------------------|-------------------------|------------------|----------------------|-------------------------|
|             |                 |       | N                  | Seropositive, n (%)   | GMT* (95% CI), EU/mL    | N                | Seropositive, n (%)  | GMT* (95% CI), EU/mL    |
| 9–25        | Seronegative    | 0     | 125                | 0 (0.0)               | 3.5 (3.5, 3.5)          | 116              | 0 (0.0)              | 3.5 (3.5, 3.5)          |
|             |                 | 7     | 125                | 125 (100)             | 5594.8 (4744.6, 6597.3) | 116              | 116 (100)            | 5294.6 (4589.5, 6107.9) |
|             |                 | 12    | 124                | 124 (100)             | 1897.1 (1559.9, 2307.3) | 116              | 116 (100)            | 1514.6 (1269.5, 1807.0) |
|             |                 | 18    | 123                | 123 (100)             | 1245.7 (1026.2, 1512.1) | 116              | 116 (100)            | 926.8 (773.9, 1110.1)   |
|             |                 | 24    | 123                | 123 (100)             | 994.6 (818.0, 1209.4)   | 115              | 115 (100)            | 729.9 (609.8, 873.6)    |
|             |                 | 36    | 125                | 125 (100)             | 888.4 (730.3, 1080.7)   | 113              | 113 (100)            | 655.2 (541.5, 792.7)    |
|             |                 | 48    | 122                | 122 (100)             | 724.4 (594.5, 882.6)    | 115              | 115 (100)            | 544.7 (454.4, 652.9)    |
|             |                 | 60    | 125                | 125 (100)             | 730.7 (606.8, 879.8)    | 116              | 116 (100)            | 576.0 (481.1, 689.5)    |
|             | Seropositive    | 0     | 21                 | 21 (100)              | 15.0 (10.8, 21.0)       | 15               | 15 (100)             | 15.6 (9.5, 25.5)        |
|             |                 | 7     | 21                 | 21 (100)              | 4521.9 (2779.9, 7355.5) | 15               | 15 (100)             | 6015.2 (4133.3, 8754.1) |
|             |                 | 12    | 21                 | 21 (100)              | 1697.3 (1015.6, 2836.7) | 15               | 15 (100)             | 1611.7 (1012.3, 2566.1) |
|             |                 | 18    | 21                 | 21 (100)              | 1223.5 (738.7, 2026.4)  | 15               | 15 (100)             | 928.0 (584.9, 1472.5)   |
|             |                 | 24    | 21                 | 21 (100)              | 932.3 (557.1, 1560.1)   | 15               | 15 (100)             | 735.7 (481.7, 1123.8)   |
|             |                 | 36    | 21                 | 21 (100)              | 896.7 (530.9, 1514.5)   | 15               | 15 (100)             | 591.7 (386.1, 906.8)    |
|             |                 | 48    | 19                 | 19 (100)              | 733.8 (415.4, 1296.0)   | 15               | 15 (100)             | 496.4 (339.2, 726.6)    |
|             |                 | 60    | 21                 | 21 (100)              | 838.5 (542.3, 1296.4)   | 15               | 15 (100)             | 435.9 (309.8, 613.2)    |
|             | Total           | 0     | 146                | 21 (14.4)             | 4.3 (3.9, 4.7)          | 131              | 15 (11.5)            | 4.2 (3.8, 4.6)          |
|             |                 | 7     | 146                | 146 (100)             | 5426.0 (4644.3, 6339.3) | 131              | 131 (100)            | 5372.5 (4707.1, 6132.0) |
|             |                 | 12    | 145                | 145 (100)             | 1866.8 (1557.9, 2236.9) | 131              | 131 (100)            | 1525.4 (1295.7, 1795.8) |
|             |                 | 18    | 144                | 144 (100)             | 1242.4 (1039.1, 1485.6) | 131              | 131 (100)            | 927.0 (784.9, 1094.7)   |
|             |                 | 24    | 144                | 144 (100)             | 985.3 (822.4, 1180.4)   | 130              | 130 (100)            | 730.5 (619.6, 861.3)    |
| 36          |                 | 146   | 146 (100)          | 889.6 (742.0, 1066.5) | 128                     | 128 (100)        | 647.4 (544.1, 770.3) |                         |
| 48          |                 | 141   | 141 (100)          | 725.6 (603.3, 872.8)  | 130                     | 130 (100)        | 538.9 (457.0, 635.5) |                         |
| 60          |                 | 146   | 146 (100)          | 745.3 (629.3, 882.7)  | 131                     | 131 (100)        | 557.9 (473.7, 657.0) |                         |

| Age (years) | Pre-vacc status | Month | 3D M0,1,6 schedule |                     |                          | 2D M0,6 schedule |                     |                          |
|-------------|-----------------|-------|--------------------|---------------------|--------------------------|------------------|---------------------|--------------------------|
|             |                 |       | N                  | Seropositive, n (%) | GMT* (95% CI), EU/mL     | N                | Seropositive, n (%) | GMT* (95% CI), EU/mL     |
| 9–14        | Seronegative    | 0     | 49                 | 0 (0.0)             | 3.5 (3.5, 3.5)           | 43               | 0 (0.0)             | 3.5 (3.5, 3.5)           |
|             |                 | 7     | 49                 | 49 (100)            | 7811.4 (6105.4, 9994.2)  | 43               | 43 (100)            | 5880.7 (4721.3, 7324.8)  |
|             |                 | 12    | 49                 | 49 (100)            | 2622.7 (1916.1, 3589.9)  | 43               | 43 (100)            | 1693.8 (1271.5, 2256.4)  |
|             |                 | 18    | 49                 | 49 (100)            | 1651.3 (1235.0, 2207.9)  | 43               | 43 (100)            | 976.1 (724.3, 1315.5)    |
|             |                 | 24    | 48                 | 48 (100)            | 1353.3 (1004.1, 1824.2)  | 43               | 43 (100)            | 745.2 (554.2, 1002.1)    |
|             |                 | 36    | 49                 | 49 (100)            | 1197.7 (901.5, 1591.1)   | 41               | 41 (100)            | 705.4 (516.3, 963.8)     |
|             |                 | 48    | 49                 | 49 (100)            | 962.6 (718.7, 1289.1)    | 42               | 42 (100)            | 566.6 (428.0, 749.9)     |
|             |                 | 60    | 49                 | 49 (100)            | 908.9 (682.3, 1210.7)    | 43               | 43 (100)            | 627.2 (476.1, 826.1)     |
|             | Seropositive    | 0     | 6                  | 6 (100)             | 15.9 (7.6, 3.6)          | 3                | 3 (100)             | 8.0 (5.8, 10.9)          |
|             |                 | 7     | 6                  | 6 (100)             | 6112.6 (3530.0, 10584.4) | 3                | 3 (100)             | 8010.4 (2256.9, 28431.7) |
|             |                 | 12    | 6                  | 6 (100)             | 2149.9 (1183.2, 3906.5)  | 3                | 3 (100)             | 2115.0 (502.1, 8908.4)   |
|             |                 | 18    | 6                  | 6 (100)             | 1519.1 (787.4, 2930.4)   | 3                | 3 (100)             | 1075.2 (277.2, 4169.8)   |
|             |                 | 24    | 6                  | 6 (100)             | 1206.3 (635.7, 2289.1)   | 3                | 3 (100)             | 909.5 (327.0, 2529.1)    |
|             |                 | 36    | 6                  | 6 (100)             | 1207.2 (641.8, 2270.5)   | 3                | 3 (100)             | 686.4 (188.7, 2497.3)    |
|             |                 | 48    | 6                  | 6 (100)             | 864.1 (440.1, 1696.5)    | 3                | 3 (100)             | 597.2 (314.0, 1135.5)    |
|             |                 | 60    | 6                  | 6 (100)             | 959.2 (517.0, 1779.9)    | 3                | 3 (100)             | 559.7 (269.2, 1163.5)    |
|             | Total           | 0     | 55                 | 6 (10.9)            | 4.1 (3.6, 4.8)           | 46               | 3 (6.5)             | 3.7 (3.5, 3.9)           |
|             |                 | 7     | 55                 | 55 (100)            | 7605.2 (6080.0, 9513.0)  | 46               | 46 (100)            | 6000.4 (4871.4, 7391.1)  |
|             |                 | 12    | 55                 | 55 (100)            | 2566.5 (1934.0, 3405.8)  | 46               | 46 (100)            | 1718.5 (1311.5, 2251.8)  |
|             |                 | 18    | 55                 | 55 (100)            | 1636.3 (1258.0, 2128.4)  | 46               | 46 (100)            | 982.3 (742.1, 1300.2)    |
|             |                 | 24    | 54                 | 54 (100)            | 1336.2 (1020.6, 1749.2)  | 46               | 46 (100)            | 754.9 (571.9, 996.6)     |
|             |                 | 36    | 55                 | 55 (100)            | 1198.7 (927.2, 1549.7)   | 44               | 44 (100)            | 704.1 (525.8, 942.8)     |
|             |                 | 48    | 55                 | 55 (100)            | 951.3 (730.1, 1239.5)    | 45               | 45 (100)            | 568.6 (437.7, 738.5)     |
|             |                 | 60    | 55                 | 55 (100)            | 914.2 (705.6, 1184.6)    | 46               | 46 (100)            | 622.5 (481.1, 805.5)     |
| 15–25       | Seronegative    | 0     | 76                 | 0 (0.0)             | 3.5 (3.5, 3.5)           | 73               | 0 (0.0)             | 3.5 (3.5, 3.5)           |
|             |                 | 7     | 76                 | 76 (100)            | 4511.6 (3658.0, 5564.4)  | 73               | 73 (100)            | 4977.0 (4119.5, 6013.1)  |
|             |                 | 12    | 75                 | 75 (100)            | 1535.3 (1202.7, 1959.9)  | 73               | 73 (100)            | 1418.0 (1129.2, 1780.7)  |
|             |                 | 18    | 74                 | 74 (100)            | 1033.6 (801.1, 1333.5)   | 73               | 73 (100)            | 899.0 (713.1, 1133.3)    |
|             |                 | 24    | 75                 | 75 (100)            | 816.7 (634.4, 1051.4)    | 72               | 72 (100)            | 720.9 (571.8, 908.9)     |
|             |                 | 36    | 76                 | 76 (100)            | 732.7 (564.5, 951.2)     | 72               | 72 (100)            | 628.2 (491.4, 803.1)     |
|             |                 | 48    | 73                 | 73 (100)            | 598.5 (460.5, 777.8)     | 73               | 73 (100)            | 532.5 (418.7, 677.2)     |
|             |                 | 60    | 76                 | 76 (100)            | 634.8 (497.9, 809.3)     | 73               | 73 (100)            | 547.8 (431.1, 696.0)     |
|             | Seropositive    | 0     | 15                 | 15 (100)            | 14.7 (9.6, 22.4)         | 12               | 12 (100)            | 18.4 (10.2, 33.0)        |

| Age (years) | Pre-vacc status | Month | 3D M0,1,6 schedule |                     |                         | 2D M0,6 schedule |                     |                         |
|-------------|-----------------|-------|--------------------|---------------------|-------------------------|------------------|---------------------|-------------------------|
|             |                 |       | N                  | Seropositive, n (%) | GMT* (95% CI), EU/mL    | N                | Seropositive, n (%) | GMT* (95% CI), EU/mL    |
|             |                 | 7     | 15                 | 15 (100)            | 4008.4 (2043.7, 7861.7) | 12               | 12 (100)            | 5599.5 (3558.6, 8811.1) |
|             |                 | 12    | 15                 | 15 (100)            | 1544.2 (755.0, 3158.3)  | 12               | 12 (100)            | 1505.9 (849.6, 2669.1)  |
|             |                 | 18    | 15                 | 15 (100)            | 1122.1 (558.5, 2254.3)  | 12               | 12 (100)            | 894.5 (502.7, 1591.8)   |
|             |                 | 24    | 15                 | 15 (100)            | 841.0 (412.4, 1714.7)   | 12               | 12 (100)            | 697.8 (410.3, 1186.7)   |
|             |                 | 36    | 15                 | 15 (100)            | 796.1 (385.8, 1642.9)   | 12               | 12 (100)            | 570.1 (335.1, 970.1)    |
|             |                 | 48    | 13                 | 13 (100)            | 680.4 (296.0, 1564.3)   | 12               | 12 (100)            | 474.0 (292.4, 768.5)    |
|             |                 | 60    | 15                 | 15 (100)            | 794.5 (436.0, 1447.9)   | 12               | 12 (100)            | 409.5 (267.8, 626.0)    |
|             | Total           | 0     | 91                 | 15 (16.5)           | 4.4 (3.9, 5.0)          | 85               | 12 (14.1)           | 4.4 (3.8, 5.1)          |
|             |                 | 7     | 91                 | 91 (100)            | 4424.5 (3617.8, 5411.0) | 85               | 85 (100)            | 5060.5 (4263.5, 6006.6) |
|             |                 | 12    | 90                 | 90 (100)            | 1536.8 (1221.9, 1932.9) | 85               | 85 (100)            | 1430.1 (1162.3, 1759.5) |
|             |                 | 18    | 89                 | 89 (100)            | 1048.0 (827.6, 1327.1)  | 85               | 85 (100)            | 898.3 (727.8, 1108.9)   |
|             |                 | 24    | 90                 | 90 (100)            | 820.7 (648.6, 1038.5)   | 84               | 84 (100)            | 717.5 (582.4, 884.0)    |
|             |                 | 36    | 91                 | 91 (100)            | 742.8 (583.0, 946.5)    | 84               | 84 (100)            | 619.5 (497.2, 772.1)    |
|             |                 | 48    | 86                 | 86 (100)            | 610.2 (476.2, 782.0)    | 85               | 85 (100)            | 523.8 (422.7, 649.1)    |
|             |                 | 60    | 91                 | 91 (100)            | 658.7 (527.8, 822.1)    | 85               | 85 (100)            | 525.7 (425.0, 650.3)    |

2D, two-dose schedule of the licensed HPV-16/18 AS04-adjuvanted vaccine formulation; 3D, three-dose schedule of the licensed HPV-16/18 AS04-adjuvanted vaccine formulation; 95% CI, exact 95% confidence interval; ATP-I, according-to-protocol immunogenicity cohort; ELISA, enzyme-linked immunosorbent assay; EU/mL, ELISA unit per milliliter; GMT, geometric mean antibody titer; M, month; N, number of evaluable seronegative subjects in the Month 60 according-to-protocol immunogenicity cohort; n (%), number (percentage) of seropositive subjects with antibody titer greater than or equal to the assay cut-off (titer equal to or above 7 EU/mL at Months 0, 7, 12, 18, 24, 36 and 48; titer equal to or above 18 EU/mL at Month 60). \*Antibody titers below the assay cut-off were given an arbitrary value of half the cut-off for the purpose of GMT calculation.
